# Supplementary material for: Spatially branched CdS–Bi2S3 heteroarchitecture: single step hydrothermal synthesis approach with enhanced field emission performance and highly responsive broadband photodetection
Source: Royal Society of Chemistry journal article supplement (doi:10.1039/c6ra21085f), 2016-01-01
Supplement: c6ra21085f1.pdf [file c6ra21085f1.pdf]

## **Supporting Information (SI)**

### **Spatially branched CdS-Bi<sub>2</sub>S<sub>3</sub> heteroarchitecture: Single step hydrothermal synthesis approach with enhanced field emission performance and highly responsive broadband photodetection**

Prashant K. Bankar<sup>1,2,†</sup>, Mahendra S. Pawar<sup>2,†</sup>, Amit S. Pawbake<sup>2,3</sup>, Sambhaji S. Warule<sup>4</sup>, Dattatray J. Late<sup>2,\*</sup>, Mahendra A. More<sup>1,\*</sup>

*<sup>1</sup>Centre for Advanced Studies in Materials Science and Condensed Matter Physics, Department of Physics, University of Pune, Pune 411007, India*

*<sup>2</sup>Physical and Materials Chemistry Division, CSIR-National Chemical Laboratory, Dr Homi Bhabha Road, Pashan, Pune 411008, India*

*<sup>3</sup>School of Energy Studies, Department of Physics, Savitribai Phule Pune University, Pune 411007, India.*

*<sup>4</sup>Department of Physics, Nowrosjee Wadia College, Savitribai Phule Pune University, Pune-411001.*

**\*Corresponding authors:** [mam@physics.unipune.ac.in](mailto:mam@physics.unipune.ac.in) [dj.late@ncl.res.in](mailto:dj.late@ncl.res.in)

**Figure S1:**

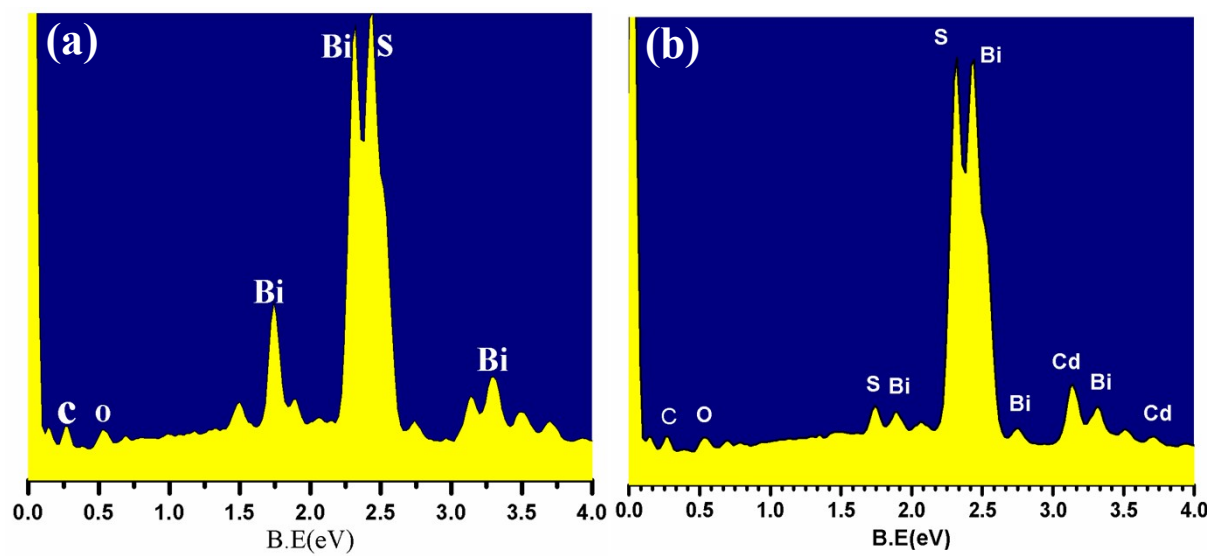

**Figure S1:** Energy dispersive analysis of X-Rays (EDAX) plot of the as synthesized (a)  $\text{Bi}_2\text{S}_3$  nanoflowers and (CdS- $\text{Bi}_2\text{S}_3$ ) heteroarchitecture.

**Figure S2:**

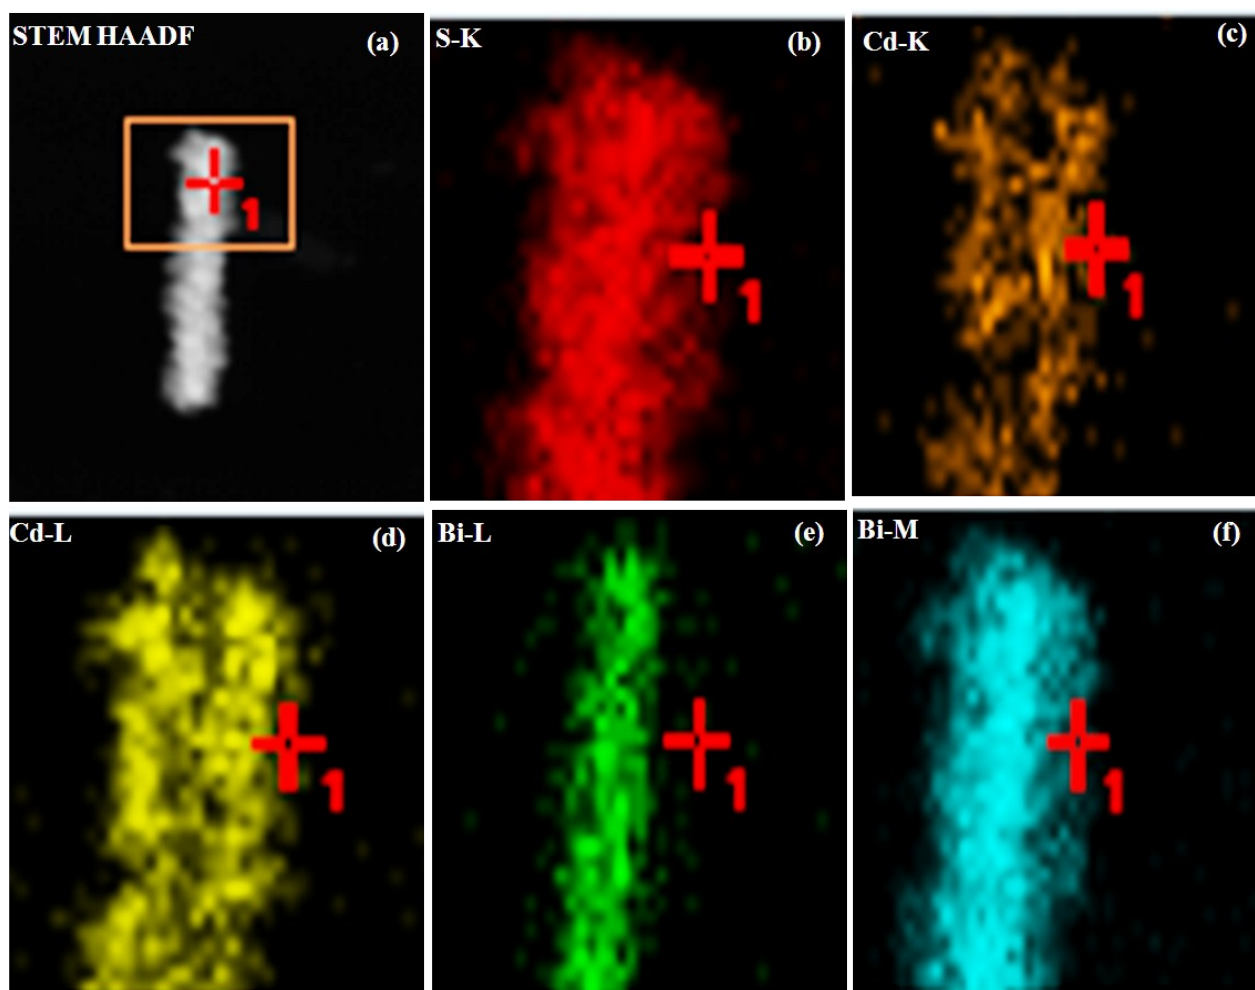

**Figure S2:** Scanning Transmission Electron Microscope-Half Angle Annular dark Field (STEM-HAADF) images which enlighten the elemental distribution of one isolate CdS-Bi<sub>2</sub>S<sub>3</sub> heteroarchitecture for elemental mapping.

Figure S3:

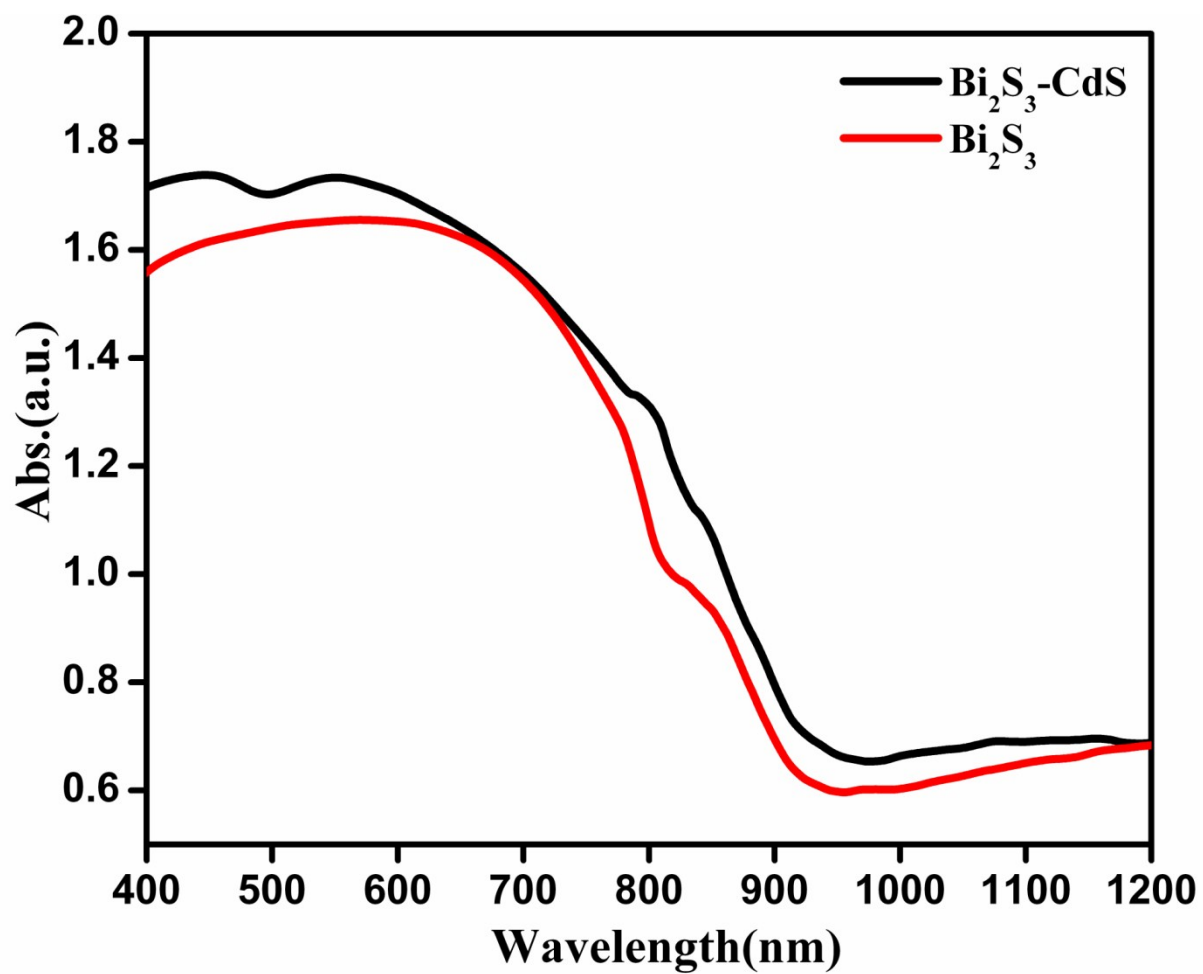

Figure S3: UV-Visible spectrum for  $\text{Bi}_2\text{S}_3$  nanoflower and  $(\text{CdS-Bi}_2\text{S}_3)$  heteroarchitecture.

**Figure S4:**

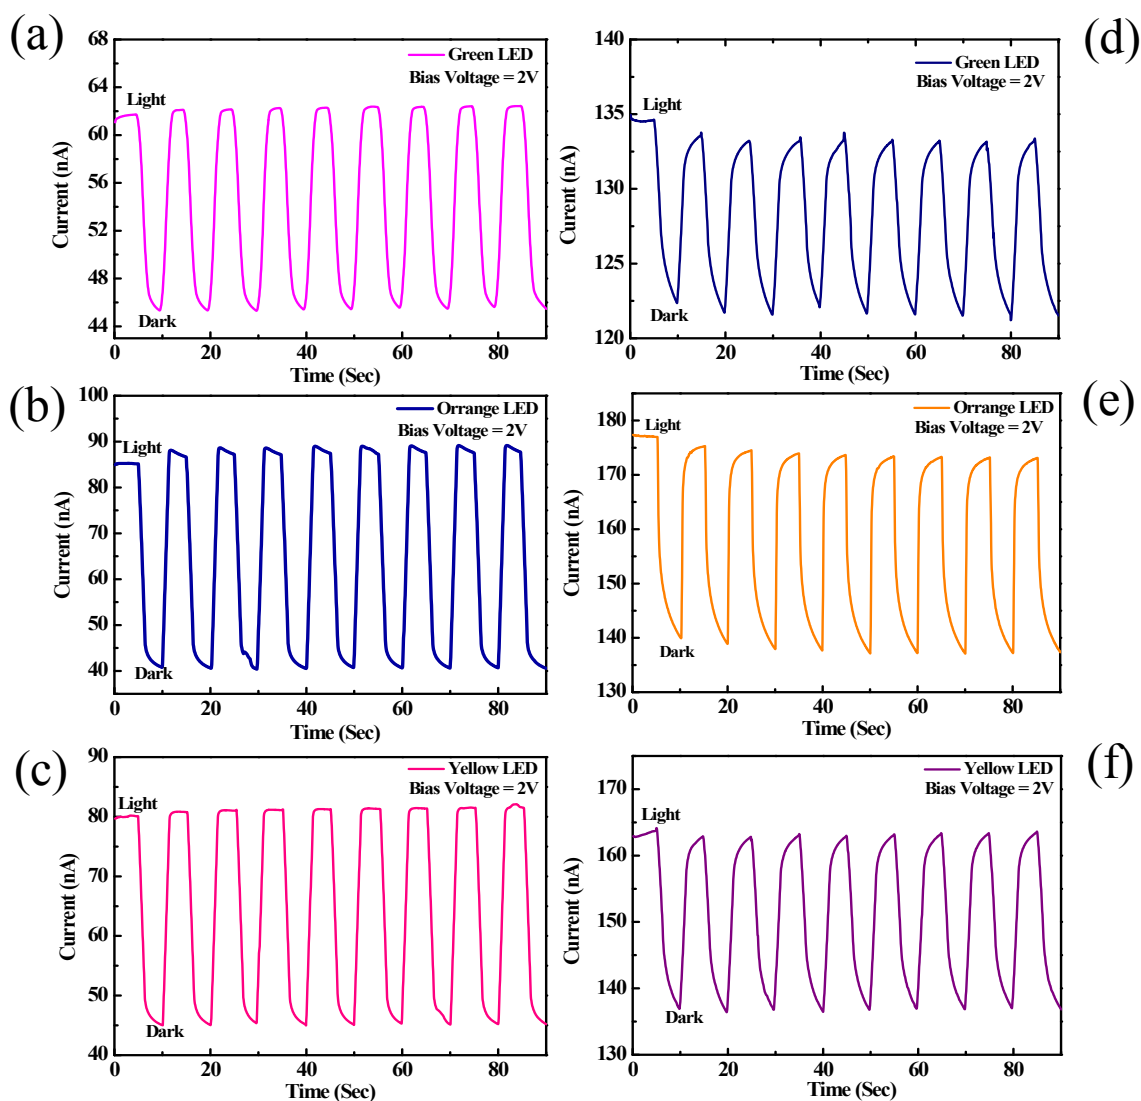

**Figure S4:** (a), (b) and (c) Typical I-t plot under the illumination of Green, orange and Yellow LED's respectively for  $\text{Bi}_2\text{S}_3$  photosensor. Figure (d), (e) and (f) shows the typical I-t plot under the illumination of Green, Orange and Yellow LED's respectively for  $\text{CdS-Bi}_2\text{S}_3$  photosensor.

| LED Types | $\text{Bi}_2\text{S}_3$ photosensor |                     | $\text{CdS-Bi}_2\text{S}_3$ photosensor |                     |
|-----------|-------------------------------------|---------------------|-----------------------------------------|---------------------|
|           | Response Time (Sec)                 | Recovery Time (Sec) | Response Time (Sec)                     | Recovery Time (Sec) |
| Green     | 2.7                                 | 4.85                | 4.7                                     | 4.68                |
| Orange    | 1.55                                | 5                   | 2.6                                     | 4.65                |
| Yellow    | 1.73                                | 4.55                | 4.3                                     | 4.5                 |

Table S1: Comparison between the calculated values of response and recovery time for the  $\text{Bi}_2\text{S}_3$  and  $\text{CdS-Bi}_2\text{S}_3$  photosensor under the light illumination of different LED's respectively with an applied bias of 2V.
